# Supplementary material for: Aberrant Methylation of RASGRF1 Is Associated with an Epigenetic Field Defect and Increased Risk of Gastric Cancer
Source: Oxford University Press journal article supplement (doi:10.1158/1940-6207.capr-12-0056), 2012-09-08
Supplement: 19406207capr120056-sup-t3_xls_78.xls [file 19406207capr120056-sup-t3_xls_78.xls]

## Sheet: vs_undiff
Supplementary Table 3. Genes hypermethylated in background gastric mucosae from patients with diffuse type GC
ProbeName	Fold change	GenbankAccession	GeneSymbol	GeneName
A_17_P02550142	4.30535	NM_001031702.2	SEMA5B	sema domain, seven thrombospondin repeats (type 1 and type 1-like), transmembrane domain (TM) and short cytoplasmic domain, (semaphorin) 5B
A_17_P07632124	3.83478	NM_003442.4	ZNF143	zinc finger protein 143
A_17_P06954333	3.41941	NM_004789.3	LHX2	LIM homeobox 2
A_17_P10493583	3.39726	NM_001614.2	ACTG1	actin, gamma 1
A_17_P08063669	3.29556	NM_005933.2	MLL	myeloid/lymphoid or mixed-lineage leukemia (trithorax homolog, Drosophila)
A_17_P11406427	3.22133	NM_000071.1	CBS	cystathionine-beta-synthase
A_17_P09248119	3.16769	NM_152447.2	LRFN5	leucine rich repeat and fibronectin type III domain containing 5
A_17_P00199079	2.99075	NM_152265.2	BTF3L4	basic transcription factor 3-like 4
A_17_P05479495	2.96036	NM_198570.2	VWC2	von Willebrand factor C domain containing 2
A_17_P10808999	2.87144	NM_182511.3	CBLN2	cerebellin 2 precursor
A_17_P07434492	2.83883	NM_013274.2	POLL	polymerase (DNA directed), lambda
A_17_P07953429	2.7836	NM_014039.2	C11orf54	chromosome 11 open reading frame 54
A_17_P09248118	2.60604	NM_152447.2	LRFN5	leucine rich repeat and fibronectin type III domain containing 5
A_17_P10342392	2.60372	NM_030753.3	WNT3	wingless-type MMTV integration site family, member 3
A_17_P09157898	2.58756		HNRPC	heterogeneous nuclear ribonucleoprotein C (C1/C2)
A_17_P09788237	2.57942	NM_181900.2	STARD5	StAR-related lipid transfer (START) domain containing 5
A_17_P07853739	2.55353	NM_018312.3	SAPS3	SAPS domain family, member 3
A_17_P05781781	2.5281	NM_177524.1	MEST	mesoderm specific transcript homolog (mouse)
A_17_P06010087	2.47559	NM_002318.2	LOXL2	lysyl oxidase-like 2
A_17_P09788236	2.45848	NM_181900.2	STARD5	StAR-related lipid transfer (START) domain containing 5
A_17_P07425240	2.4384	NM_031212.3	SLC25A28	solute carrier family 25, member 28
A_17_P03190844	2.43368	NM_001009922.1	RCHY1	ring finger and CHY zinc finger domain containing 1
A_17_P10486297	2.41253	NM_019020.2	TBC1D16	TBC1 domain family, member 16
A_17_P05781779	2.40842	NM_177524.1	MEST	mesoderm specific transcript homolog (mouse)
A_17_P10962067	2.39978	NM_020971.2	SPTBN4	spectrin, beta, non-erythrocytic 4
A_17_P00203936	2.32166	NM_033067.1	DMRTB1	DMRT-like family B with proline-rich C-terminal, 1
A_17_P07301818	2.31844	NM_207119.1	LRRC20	leucine rich repeat containing 20
A_17_P09155716	2.30028	NM_002937.3	RNASE4	ribonuclease, RNase A family, 4
A_17_P10959559	2.29158	NM_016941.2	DLL3	delta-like 3 (Drosophila)
A_17_P09287377	2.27344	NM_015163.4	TRIM9	tripartite motif-containing 9
A_17_P04294114	2.27004	NM_213648.1	TCF7	transcription factor 7 (T-cell specific, HMG-box)
A_17_P11350964	2.25918	NM_003253.2	TIAM1	T-cell lymphoma invasion and metastasis 1
A_17_P10362274	2.24172	NM_016001.2	UTP18	UTP18, small subunit (SSU) processome component, homolog (yeast)
A_17_P07024347	2.19559	NM_018702.2	ADARB2	adenosine deaminase, RNA-specific, B2 (RED2 homolog rat)
A_17_P10203796	2.18823	NM_213726.1	INCA1	inhibitor of CDK interacting with cyclin A1
A_17_P06447349	2.18464	NM_007218.3	RNF139	ring finger protein 139
A_17_P00856868	2.16974	NM_022786.1	ARV1	ARV1 homolog (S. cerevisiae)
A_17_P09626969	2.16565	NM_012388.2	PLDN	pallidin homolog (mouse)
A_17_P11009561	2.1558	NM_198542.1	ZNF773	zinc finger protein 773
A_17_P03335754	2.15376	NM_016269.2	LEF1	lymphoid enhancer-binding factor 1
A_17_P09892180	2.15101	NM_024507.2	KREMEN2	kringle containing transmembrane protein 2
A_17_P10999470	2.1399	NM_001077446.1	TSEN34	tRNA splicing endonuclease 34 homolog (S. cerevisiae)
A_17_P08827850	2.1378	NM_025113.2	C13orf18	chromosome 13 open reading frame 18
A_17_P03052118	2.12321	NM_025132.3	WDR19	WD repeat domain 19
A_17_P00145506	2.1128	NM_006802.2	SF3A3	splicing factor 3a, subunit 3, 60kDa
A_17_P00455564	2.07512	NM_002232.3	KCNA3	potassium voltage-gated channel, shaker-related subfamily, member 3
A_17_P10296701	2.0612	NM_207454.2	FLJ44815	FLJ44815 protein
A_17_P11117928	2.03795	NM_001052.2	SSTR4	somatostatin receptor 4
A_17_P03063984	2.03133	NM_001029955.3	WDR21B	WD repeat domain 21B
A_17_P05775445	2.02469	NM_001098629.1	IRF5	interferon regulatory factor 5
A_17_P08562848	2.0161	NM_201612.1	IKIP	IKK interacting protein
A_17_P04967417	2.00097	NM_018013.3	SOBP	sine oculis binding protein homolog (Drosophila)
A_17_P11111544	1.99769	NM_006192.3	PAX1	paired box 1
A_17_P08685946	1.98922	NM_144669.1	GLT1D1	glycosyltransferase 1 domain containing 1
A_17_P02029669	1.9854	NM_002222.4	ITPR1	inositol 1,4,5-triphosphate receptor, type 1
A_17_P11024579	1.98538	NM_032034.2	SLC4A11	solute carrier family 4, sodium borate transporter, member 11
A_17_P04803999	1.97903	NM_078485.2	COL9A1	collagen, type IX, alpha 1
A_17_P03927457	1.97148	NM_002203.3	ITGA2	integrin, alpha 2 (CD49B, alpha 2 subunit of VLA-2 receptor)
A_17_P04142845	1.95939	NM_175052.1	ST8SIA4	ST8 alpha-N-acetyl-neuraminide alpha-2,8-sialyltransferase 4
A_17_P08063663	1.95895	NM_005933.2	MLL	myeloid/lymphoid or mixed-lineage leukemia (trithorax homolog, Drosophila)
A_17_P11117930	1.94558	NM_001052.2	SSTR4	somatostatin receptor 4
A_17_P07139581	1.94235	NM_000818.1	GAD2	glutamate decarboxylase 2 (pancreatic islets and brain, 65kDa)
A_17_P04327837	1.94177	NM_032406.1///NM_018928.2	PCDHGC4	protocadherin gamma subfamily C, 4
A_17_P04639421	1.94079	NM_021253.2	TRIM39	tripartite motif-containing 39
A_17_P04227587	1.92717	NM_014350.2	TNFAIP8	tumor necrosis factor, alpha-induced protein 8
A_17_P07669016	1.92168	NM_002478.4	MYOD1	myogenic differentiation 1
A_17_P10974037	1.90286	NM_212550.3	BLOC1S3	biogenesis of lysosome-related organelles complex-1, subunit 3
A_17_P09639769	1.90159	NM_001025249.1	DUT	deoxyuridine triphosphatase
A_17_P11350967	1.89906	NM_003253.2	TIAM1	T-cell lymphoma invasion and metastasis 1
A_17_P10952328	1.89186	NM_144689.3	ZNF420	zinc finger protein 420
A_17_P04313903	1.88567	NM_022809.2	CDC25C	cell division cycle 25 homolog C (S. pombe)
A_17_P00930966	1.87891	NM_175911.2	OR2L13	olfactory receptor, family 2, subfamily L, member 13
A_17_P07047055	1.87419	NM_004566.2	PFKFB3	6-phosphofructo-2-kinase/fructose-2,6-biphosphatase 3
A_17_P01695260	1.87398	NM_002148.3	HOXD10	homeobox D10
A_17_P00022828	1.8723	NM_015557.1	CHD5	Coronary heart disease, susceptibility to, 5///chromodomain helicase DNA binding protein 5
A_17_P06741102	1.86657	NM_006914.3	RORB	RAR-related orphan receptor B
A_17_P11024577	1.86608	NM_032034.2	SLC4A11	solute carrier family 4, sodium borate transporter, member 11
A_17_P09671943	1.86368	NM_001033559.1	DYX1C1	dyslexia susceptibility 1 candidate 1
A_17_P11032872	1.85862	NM_144773.2	PROKR2	prokineticin receptor 2
A_17_P11002626	1.85342	NM_000991.3	RPL28	ribosomal protein L28
A_17_P00930969	1.85326	NM_175911.2	OR2L13	olfactory receptor, family 2, subfamily L, member 13
A_17_P05480584	1.85044	NM_007009.1	ZPBP	zona pellucida binding protein
A_17_P07632123	1.84822	NM_003442.4	ZNF143	zinc finger protein 143
A_17_P09821927	1.84344	NM_018670.2	MESP1	mesoderm posterior 1 homolog (mouse)
A_17_P05240307	1.84143	NM_003181.2	T	T, brachyury homolog (mouse)
A_17_P08359677	1.83791	NM_004178.4	TARBP2	TAR (HIV-1) RNA binding protein 2
A_17_P10216562	1.83346	NM_032580.2	HES7	hairy and enhancer of split 7 (Drosophila)
A_17_P07632122	1.8213	NM_003442.4	ZNF143	zinc finger protein 143
A_17_P07300886	1.82121	NM_001040273.1	TYSND1	trypsin domain containing 1
A_17_P04642722	1.82079	NM_001077511.1	TCF19	transcription factor 19 (SC1)
A_17_P06940322	1.81884	NM_005047.2	PSMD5	proteasome (prosome, macropain) 26S subunit, non-ATPase, 5
A_17_P09608339	1.81364	NM_133487.2	RAD51	RAD51 homolog (RecA homolog, E. coli) (S. cerevisiae)
A_17_P11024441	1.80791	NM_181493.1	ITPA	inosine triphosphatase (nucleoside triphosphate pyrophosphatase)
A_17_P09227058	1.80552		TITF1	NK2 homeobox 1
A_17_P09294549	1.80348	NM_002806.2	PSMC6	proteasome (prosome, macropain) 26S subunit, ATPase, 6
A_17_P10846083	1.80132	NM_172388.1	NFATC1	nuclear factor of activated T-cells, cytoplasmic, calcineurin-dependent 1
A_17_P07102222	1.79816	NM_003473.2	STAM	signal transducing adaptor molecule (SH3 domain and ITAM motif) 1
A_17_P00930972	1.79249	NM_175911.2	OR2L13	olfactory receptor, family 2, subfamily L, member 13
A_17_P02667526	1.78385	NM_015472.3	WWTR1	WW domain containing transcription regulator 1
A_17_P06849432	1.78204	NM_015051.1	TXNDC4	thioredoxin domain containing 4 (endoplasmic reticulum)
A_17_P10959187	1.78077	NM_022835.2	PLEKHG2	pleckstrin homology domain containing, family G (with RhoGef domain) member 2
A_17_P05699508	1.78003	NM_152556.2	FLJ31818	hypothetical protein FLJ31818
A_17_P07210357	1.77843	NM_001042427.1	C10orf53	chromosome 10 open reading frame 53
A_17_P08827851	1.77586	NM_025113.2	C13orf18	chromosome 13 open reading frame 18
A_17_P00164443	1.77544	NM_004559.3	YBX1	Y box binding protein 1
A_17_P08781402	1.77251	NM_001111045.1	CCNA1	cyclin A1
A_17_P09767154	1.77246	NM_145805.1	ISL2	ISL LIM homeobox 2
A_17_P09990796	1.76299	XR_040028.1	FLJ43980	FLJ43980 protein
A_17_P11499848	1.76168	NM_013356.2	SLC16A8	solute carrier family 16, member 8 (monocarboxylic acid transporter 3)
A_17_P10989494	1.75544	NM_004533.3	MYBPC2	myosin binding protein C, fast type
A_17_P03053903	1.75308		HIP2	ubiquitin-conjugating enzyme E2K
A_17_P03113869	1.75236	NM_006452.3	PAICS	phosphoribosylaminoimidazole carboxylase, phosphoribosylaminoimidazole succinocarboxamide synthetase
A_17_P10902198	1.74467	NM_198580.1	SLC27A1	solute carrier family 27 (fatty acid transporter), member 1
A_17_P03861062	1.74408	NM_152295.3	TARS	threonyl-tRNA synthetase
A_17_P10975488	1.74244	NM_017659.2	QPCTL	glutaminyl-peptide cyclotransferase-like
A_17_P07562860	1.74205		FLJ46831	forkhead box I2
A_17_P10096084	1.74151	NM_012426.3	SF3B3	splicing factor 3b, subunit 3, 130kDa
A_17_P08140780	1.74079	NM_015261.2	NCAPD3	non-SMC condensin II complex, subunit D3
A_17_P00011786	1.74032	NM_207306.2	KIAA0495	KIAA0495
A_17_P07734873	1.73855	NM_024425.2	WT1	Wilms tumor 1
A_17_P09475852	1.72647	NM_153646.2	SLC24A4	solute carrier family 24 (sodium/potassium/calcium exchanger), member 4
A_17_P10684289	1.72506	NM_013305.4	ST8SIA5	ST8 alpha-N-acetyl-neuraminide alpha-2,8-sialyltransferase 5
A_17_P04690235	1.725	NM_001760.2	CCND3	cyclin D3
A_17_P10044031	1.72431		FLJ10815	solute carrier family 38, member 7
A_17_P08231870	1.72112	NM_000921.3	PDE3A	phosphodiesterase 3A, cGMP-inhibited
A_17_P11247378	1.71834	NM_006242.3	PPP1R3D	protein phosphatase 1, regulatory (inhibitor) subunit 3D
A_17_P05592900	1.71814	NM_018843.2	SLC25A40	solute carrier family 25, member 40
A_17_P10976045	1.71274	NM_004819.2	SYMPK	symplekin
A_17_P09893594	1.70794	NM_153028.2	ZNF75A	zinc finger protein 75a
A_17_P08359085	1.70532	NM_138473.2	SP1	Sp1 transcription factor
A_17_P07595452	1.70388	NM_031264.2	MUPCDH	mucin-like protocadherin
A_17_P00830592	1.69973	NM_152495.1	CNIH3	cornichon homolog 3 (Drosophila)
A_17_P00830589	1.69438	NM_152495.1	CNIH3	cornichon homolog 3 (Drosophila)
A_17_P11302006	1.68984	NM_004540.2	NCAM2	neural cell adhesion molecule 2
A_17_P04327782	1.68883	NM_032402.1	PCDHGC3	protocadherin gamma subfamily C, 3
A_17_P09888606	1.6867	NM_002952.3	RPS2	ribosomal protein S2
A_17_P09529821	1.6838	NM_001080464.1	LOC374569	Similar to Lysophospholipase
A_17_P04693529	1.68276	NM_003192.2	TBCC	tubulin folding cofactor C
A_17_P05646881	1.68016	NM_017984.3	ZCWPW1	zinc finger, CW type with PWWP domain 1
A_17_P03761836	1.67991	NM_031916.3	ROPN1L	ropporin 1-like
A_17_P06716623	1.67953	NM_201629.1	TJP2	tight junction protein 2 (zona occludens 2)
A_17_P10978736	1.6789	NM_005628.1	SLC1A5	solute carrier family 1 (neutral amino acid transporter), member 5
A_17_P07833005	1.67885	NM_173810.3	TTC9C	tetratricopeptide repeat domain 9C
A_17_P10995462	1.678	NM_014225.3	PPP2R1A	protein phosphatase 2 (formerly 2A), regulatory subunit A , alpha isoform
A_17_P04282709	1.6778	NM_016340.4	RAPGEF6	Rap guanine nucleotide exchange factor (GEF) 6
A_17_P10908090	1.67599	NM_134440.1	RFXANK	regulatory factor X-associated ankyrin-containing protein
A_17_P02758994	1.67444	NM_014373.1	GPR160	G protein-coupled receptor 160
A_17_P10305345	1.66524	NM_005568.2	LHX1	LIM homeobox 1
A_17_P03153308	1.66254	NM_004439.4	EPHA5	EPH receptor A5
A_17_P10951130	1.66205	NM_020951.3	ZNF529	zinc finger protein 529
A_17_P04927763	1.66188	NM_005604.2	POU3F2	POU class 3 homeobox 2
A_17_P07836584	1.66002	NM_173587.2	RCOR2	REST corepressor 2
A_17_P08167971	1.65498	NM_000217.2	KCNA1	potassium voltage-gated channel, shaker-related subfamily, member 1 (episodic ataxia with myokymia)
A_17_P10244012	1.65462	NM_006041.1	HS3ST3B1	heparan sulfate (glucosamine) 3-O-sulfotransferase 3B1
A_17_P07020387	1.65306	NM_014023.3	WDR37	WD repeat domain 37
A_17_P04327835	1.65138	NM_032406.1	PCDHGC4	protocadherin gamma subfamily C, 4
A_17_P11407848	1.6513	NM_173354.3	SNF1LK	SNF1-like kinase
A_17_P08112561	1.64904	NM_002017.2	FLI1	Friend leukemia virus integration 1
A_17_P06037838	1.64866	NM_057158.2	DUSP4	dual specificity phosphatase 4
A_17_P11117932	1.64702	NM_001052.2	SSTR4	somatostatin receptor 4
A_17_P01707621	1.64645	NM_001042702.2	DFNB59	deafness, autosomal recessive 59
A_17_P02448448	1.64349	NM_014820.3	TOMM70A	translocase of outer mitochondrial membrane 70 homolog A (S. cerevisiae)
A_17_P03563412	1.64333	NM_005038.2	PPID	peptidylprolyl isomerase D (cyclophilin D)
A_17_P07425242	1.64053	NM_031212.3	SLC25A28	solute carrier family 25, member 28
A_17_P02993990	1.6386	NM_203284.1	RBPJ	recombination signal binding protein for immunoglobulin kappa J region
A_17_P04538365	1.63831	NM_022085.3	TXNDC5	thioredoxin domain containing 5
A_17_P05058553	1.63818	NM_014702.3	KIAA0408	KIAA0408
A_17_P10868325	1.63695	NM_175614.2	NDUFA11	NADH dehydrogenase (ubiquinone) 1 alpha subcomplex, 11, 14.7kDa
A_17_P10036835	1.63295	NM_014685.2	HERPUD1	homocysteine-inducible, endoplasmic reticulum stress-inducible, ubiquitin-like domain member 1
A_17_P07301816	1.63209	NM_207119.1	LRRC20	leucine rich repeat containing 20
A_17_P04688757	1.63136	NM_005586.3	MDFI	MyoD family inhibitor
A_17_P07493866	1.62924	NM_198514.2	NHLRC2	NHL repeat containing 2
A_17_P01196695	1.62746	NM_001039348.1	EFEMP1	EGF-containing fibulin-like extracellular matrix protein 1
A_17_P10194152	1.62731	NM_020310.2	MNT	MAX binding protein
A_17_P08617938	1.62521	NM_024953.2	C12orf30	chromosome 12 open reading frame 30
A_17_P07210010	1.6227	NM_020986.2	CHAT	choline acetyltransferase
A_17_P04834772	1.62172	NM_000863.1	HTR1B	5-hydroxytryptamine (serotonin) receptor 1B
A_17_P04657215	1.62104	NM_005643.2	TAF11	TAF11 RNA polymerase II, TATA box binding protein (TBP)-associated factor, 28kDa
A_17_P03556496	1.6203	NM_001083619.1	GRIA2	glutamate receptor, ionotropic, AMPA 2
A_17_P05675137	1.61938	NM_024814.1	CBLL1	Cas-Br-M (murine) ecotropic retroviral transforming sequence-like 1
A_17_P01479596	1.61804	NM_015320.2	ARHGEF4	Rho guanine nucleotide exchange factor (GEF) 4
A_17_P05649974	1.61796	NM_133457.2	EMID2	EMI domain containing 2
A_17_P08167970	1.61677	NM_000217.2	KCNA1	potassium voltage-gated channel, shaker-related subfamily, member 1 (episodic ataxia with myokymia)
A_17_P09826248	1.61663	NM_002005.2	FES	feline sarcoma oncogene
A_17_P04628813	1.61381	NM_007149.1	ZNF184	zinc finger protein 184
A_17_P00203934	1.60848	NM_033067.1	DMRTB1	DMRT-like family B with proline-rich C-terminal, 1
A_17_P10251800	1.60784	NM_152350.2	C17orf45	chromosome 17 open reading frame 45
A_17_P09077779	1.60692	NM_033132.3	ZIC5	Zic family member 5 (odd-paired homolog, Drosophila)
A_17_P01479597	1.60632	NM_015320.2	ARHGEF4	Rho guanine nucleotide exchange factor (GEF) 4
A_17_P07509885	1.60488	NM_001112704.1	VAX1	ventral anterior homeobox 1
A_17_P01092989	1.60487		BC038980:147
A_17_P11355277	1.59598	NM_021254.1	C21orf59	chromosome 21 open reading frame 59
A_17_P02295476	1.59482	NM_000333.2	ATXN7	ataxin 7
A_17_P09551469	1.5941	NM_000810.2	GABRA5	gamma-aminobutyric acid (GABA) A receptor, alpha 5
A_17_P02900231	1.59273	NM_014392.3	D4S234E	DNA segment on chromosome 4 (unique) 234 expressed sequence
A_17_P02886472	1.59256	NM_000283.2	PDE6B	phosphodiesterase 6B, cGMP-specific, rod, beta (congenital stationary night blindness 3, autosomal dominant)
A_17_P07267659	1.59249	NM_199451.2	ZNF365	zinc finger protein 365
A_17_P09983829	1.59229	NM_145271.3	ZNF688	zinc finger protein 688
A_17_P07056457	1.59138	NM_207423.1	FLJ45983	FLJ45983 protein
A_17_P06137340	1.5908	NM_006211.2	PENK	proenkephalin
A_17_P11024442	1.59018	NM_181493.1	ITPA	inosine triphosphatase (nucleoside triphosphate pyrophosphatase)
A_17_P02886473	1.58689	NM_000283.2	PDE6B	phosphodiesterase 6B, cGMP-specific, rod, beta (congenital stationary night blindness 3, autosomal dominant)
A_17_P11024440	1.58409	NM_181493.1	ITPA	inosine triphosphatase (nucleoside triphosphate pyrophosphatase)
A_17_P01963447	1.58293	NM_004846.2	EIF4E2	eukaryotic translation initiation factor 4E family member 2
A_17_P10216564	1.58284	NM_032580.2	HES7	hairy and enhancer of split 7 (Drosophila)
A_17_P09227059	1.58276		TITF1	NK2 homeobox 1
A_17_P08167967	1.58237	NM_000217.2	KCNA1	potassium voltage-gated channel, shaker-related subfamily, member 1 (episodic ataxia with myokymia)
A_17_P05240309	1.58101	NM_003181.2	T	T, brachyury homolog (mouse)
A_17_P05675136	1.58045	NM_024814.1	CBLL1	Cas-Br-M (murine) ecotropic retroviral transforming sequence-like 1
A_17_P07953432	1.57626	NM_014039.2	C11orf54	chromosome 11 open reading frame 54
A_17_P07126289	1.57607	NM_178161.2	PTF1A	pancreas specific transcription factor, 1a
A_17_P09227057	1.57533		TITF1	NK2 homeobox 1
A_17_P08339955	1.57421	NM_003394.2	WNT10B	wingless-type MMTV integration site family, member 10B
A_17_P06856721	1.57331	NM_133445.1	GRIN3A	glutamate receptor, ionotropic, N-methyl-D-aspartate 3A
A_17_P05500969	1.57253	NM_001012456.1	SEC61G	Sec61 gamma subunit
A_17_P01479599	1.5723	NM_015320.2	ARHGEF4	Rho guanine nucleotide exchange factor (GEF) 4
A_17_P00136134	1.57196	NM_012199.2	EIF2C1	eukaryotic translation initiation factor 2C, 1
A_17_P07511939	1.57028	NM_004098.3	EMX2	empty spiracles homeobox 2
A_17_P07618674	1.56809	NM_000543.3	SMPD1	sphingomyelin phosphodiesterase 1, acid lysosomal
A_17_P10125309	1.5679	NM_014940.2	MON1B	MON1 homolog B (yeast)
A_17_P10213190	1.56774	NM_003985.3	TNK1	tyrosine kinase, non-receptor, 1
A_17_P00830587	1.56744	NM_152495.1	CNIH3	cornichon homolog 3 (Drosophila)
A_17_P05091090	1.56719	NM_198392.1	TCF21	transcription factor 21
A_17_P03479515	1.5671	NM_004362.1	CLGN	calmegin
A_17_P01479594	1.5665	NM_015320.2	ARHGEF4	Rho guanine nucleotide exchange factor (GEF) 4
A_17_P09387845	1.56617	NM_152331.3	ACOT4	acyl-CoA thioesterase 4
A_17_P10905839	1.56591	NM_012109.2	TMEM59L	transmembrane protein 59-like
A_17_P11500265	1.56535	NM_012323.2	MAFF	v-maf musculoaponeurotic fibrosarcoma oncogene homolog F (avian)
A_17_P04065013	1.5637	NM_005711.3	EDIL3	EGF-like repeats and discoidin I-like domains 3
A_17_P06126604	1.5629	NM_003702.2	RGS20	regulator of G-protein signaling 20
A_17_P06207697	1.56016	NM_005098.3	MSC	musculin (activated B-cell factor-1)
A_17_P01255065	1.5593		C2orf32	cannabinoid receptor interacting protein 1
A_17_P09516770	1.55928		hsa-mir-431:-275
A_17_P04970868	1.55886	NM_003269.2	NR2E1	nuclear receptor subfamily 2, group E, member 1
A_17_P10512795	1.55855	NM_173210.1	TGIF1	TGFB-induced factor homeobox 1
A_17_P06970465	1.55837	NM_001002913.1	PTRH1	peptidyl-tRNA hydrolase 1 homolog (S. cerevisiae)
A_17_P05629178	1.55648	NM_004411.3	DYNC1I1	dynein, cytoplasmic 1, intermediate chain 1
A_17_P05527772	1.55395	NM_022479.1	WBSCR17	Williams-Beuren syndrome chromosome region 17
A_17_P11137941	1.55164	NM_003098.2	SNTA1	syntrophin, alpha 1 (dystrophin-associated protein A1, 59kDa, acidic component)
A_17_P10957901	1.55154	NM_012237.2	SIRT2	sirtuin (silent mating type information regulation 2 homolog) 2 (S. cerevisiae)
A_17_P08041939	1.55085	NM_006006.4	ZBTB16	zinc finger and BTB domain containing 16
A_17_P10834503	1.54789	NM_001480.3	GALR1	galanin receptor 1
A_17_P09610807	1.54764	NM_016359.2	NUSAP1	nucleolar and spindle associated protein 1
A_17_P02155194	1.54751	NM_017801.2	CMTM6	CKLF-like MARVEL transmembrane domain containing 6
A_17_P05903585	1.54741	NM_002847.2	PTPRN2	protein tyrosine phosphatase, receptor type, N polypeptide 2
A_17_P00506347	1.54689		MGC29891	GA binding protein transcription factor, beta subunit 2
A_17_P09516778	1.54658		hsa-mir-433:-218
A_17_P11020191	1.54481	NM_080836.2	STK35	serine/threonine kinase 35
A_17_P09990793	1.54126	XR_040028.1	FLJ43980	FLJ43980 protein
A_17_P02077006	1.54104	NM_152396.2	METTL6	methyltransferase like 6
A_17_P11376897	1.541	NM_018962.1	DSCR6	Down syndrome critical region gene 6
A_17_P09135848	1.54083	NM_198219.1	ING1	inhibitor of growth family, member 1
A_17_P11157895	1.54061	NM_080552.2	SLC32A1	solute carrier family 32 (GABA vesicular transporter), member 1
A_17_P01695262	1.53941	NM_002148.3	HOXD10	homeobox D10
A_17_P01953336	1.53809	NM_174899.4	FBXO36	F-box protein 36
A_17_P01232343	1.53684	NM_001001521.1	UGP2	UDP-glucose pyrophosphorylase 2
A_17_P08158244	1.53631	NM_018463.2	ITFG2	integrin alpha FG-GAP repeat containing 2
A_17_P07434490	1.53607	NM_013274.2	POLL	polymerase (DNA directed), lambda
A_17_P03556497	1.53581	NM_001083619.1	GRIA2	glutamate receptor, ionotropic, AMPA 2
A_17_P04496675	1.53566	NM_175062.3	RASGEF1C	RasGEF domain family, member 1C
A_17_P10962352	1.5335	NM_020971.2	SPTBN4	spectrin, beta, non-erythrocytic 4
A_17_P03863436	1.53277	NM_016568.2	RXFP3	relaxin/insulin-like family peptide receptor 3
A_17_P10214076	1.53236	NM_004870.2	MPDU1	mannose-P-dolichol utilization defect 1
A_17_P00152824	1.53167	NM_016257.2	HPCAL4	hippocalcin like 4
A_17_P02716594	1.53126	NM_001002800.1	SMC4	structural maintenance of chromosomes 4
A_17_P10031339	1.53114	NM_001043.2	SLC6A2	solute carrier family 6 (neurotransmitter transporter, noradrenalin), member 2
A_17_P01686469	1.52873	NM_001005303.1	FLJ46347	hypothetical LOC389064
A_17_P00930973	1.528	NM_175911.2	OR2L13	olfactory receptor, family 2, subfamily L, member 13
A_17_P10851882	1.52613	NM_032551.3	KISS1R	KISS1 receptor
A_17_P05768475	1.52291	NM_176814.3	ZNF800	zinc finger protein 800
A_17_P08521244	1.52286	NM_022652.2	DUSP6	dual specificity phosphatase 6
A_17_P07840756	1.52038	NM_130801.1	MEN1	multiple endocrine neoplasia I
A_17_P02804235	1.51935	NM_003940.1	USP13	ubiquitin specific peptidase 13 (isopeptidase T-3)
A_17_P05129416	1.51854	NM_001032395.1	GPR126	G protein-coupled receptor 126
A_17_P08402466	1.51841	NM_000706.3	AVPR1A	arginine vasopressin receptor 1A
A_17_P10296702	1.518	NM_207313.1	TMEM132E	transmembrane protein 132E
A_17_P11241698	1.51703	NM_001077488.1	GNAS	GNAS complex locus
A_17_P10329222	1.51627	NM_025267.2	AARSD1	alanyl-tRNA synthetase domain containing 1
A_17_P08148704	1.51575	NM_134424.2	RAD52	RAD52 homolog (S. cerevisiae)
A_17_P09891638	1.5149		chr16:2788733-2788780
A_17_P08816149	1.51385	NM_153218.1	C13orf31	chromosome 13 open reading frame 31
A_17_P02295478	1.5117	NM_000333.2	ATXN7	ataxin 7
A_17_P02896550	1.51156	NM_001012982.2	LOC345222	hypothetical gene supported by BC043530
A_17_P09965847	1.51155	NM_006539.2	CACNG3	calcium channel, voltage-dependent, gamma subunit 3
A_17_P11006129	1.50903	NM_022103.2	ZNF667	zinc finger protein 667
A_17_P07082421	1.50859	NM_012247.3	SEPHS1	selenophosphate synthetase 1
A_17_P03937914	1.50823		CCNU	cyclin O
A_17_P04183653	1.50804	NM_002372.2	MAN2A1	mannosidase, alpha, class 2A, member 1
A_17_P04327785	1.50721	NM_032402.1	PCDHGC3	protocadherin gamma subfamily C, 3
A_17_P06979151	1.50711	NM_020960.3	GPR107	G protein-coupled receptor 107
A_17_P10305351	1.50693	NM_005568.2	LHX1	LIM homeobox 1
A_17_P04970870	1.50614	NM_003269.2	NR2E1	nuclear receptor subfamily 2, group E, member 1
A_17_P09235151	1.50455	NM_001049.2	SSTR1	somatostatin receptor 1
A_17_P10116184	1.50418	NM_032268.3	ZNRF1	zinc and ring finger 1
A_17_P10043828	1.50377	NM_016284.3	CNOT1	CCR4-NOT transcription complex, subunit 1
A_17_P04326682	1.50238	NM_018935.2	PCDHB15	protocadherin beta 15
A_17_P06702111	1.50187	NM_001076677.1	CLTA	clathrin, light chain (Lca)
