# Supplementary material for: Aberrant Methylation of RASGRF1 Is Associated with an Epigenetic Field Defect and Increased Risk of Gastric Cancer
Source: Oxford University Press journal article supplement (doi:10.1158/1940-6207.capr-12-0056), 2012-09-08
Supplement: 19406207capr120056-sup-t5_xls_33k.xls [file 19406207capr120056-sup-t5_xls_33k.xls]

## Sheet: Sheet1
Supplementary Table 5. Correlation between RASGRF1 methylation and clinicopathological features in GC
		Total	Unmethylated	Methylated	P-value
		(n = 130)	(n = 58)	(n = 72)
Age	mean	66.8	65.931	67.5	0.436
	SD	11.4	10.8593	11.794
Gender	Male	90	42	48	0.443
	Female	39	15	24
Histology	Intestinal	62	31	31	0.29
	Diffuse	68	27	41
Macroscopic type
	0	29	7	22	0.151
	1	9	4	5
	2	25	9	16
	3	23	11	12
	4	10	7	3
	5	4	1	3
Lymphatic invasion
	0	34	12	22	0.52
	1	61	28	33
	2	10	4	6
	3	5	2	3
Venous invasion
	0	56	18	38	0.071
	1	46	25	21
	2	7	3	4
	3	1	0	1
pT category
	1	45	14	31	0.045
	2	41	17	24
	3	31	19	12
	4	5	1	4
pN category
	0	52	17	35	0.136
	1	37	19	18
	2	20	8	12
	3	13	7	6
pM category
	0	108	40	68	0.002
	1	18	14	4
Stage (pTNM)
	1	55	19	36	0.011
	2	20	8	12
	3	22	10	12
	4	33	21	12
